# Supplementary material for: Phytoavailability of silver at predicted environmental concentrations: does the initial ionic or nanoparticulate form matter?
Source: Royal Society of Chemistry journal article supplement (doi:10.1039/c8en00644j), 2018-10-16
Supplement: c8en00644j1.pdf [file c8en00644j1.pdf]

## Electronic Supplementary Information (ESI)

### **Phytoavailability of silver at predicted environmental concentrations: does the initial ionic or nanoparticulate form matter?"**

C. Layet<sup>ab</sup>, C. Santaella<sup>bcd</sup>, M. Auffan<sup>abe</sup>, C. Chevassus-Rosset<sup>f</sup>, M. Montes<sup>f</sup>, C. Levard<sup>ab</sup>, P. Ortet<sup>cd</sup>, M. Barakat<sup>cd</sup>, E. Doelsch<sup>f\*</sup>

<sup>a</sup> Aix Marseille Univ, CNRS, IRD, INRA, Coll France, CEREGE, Aix-en-Provence, France.

<sup>b</sup> iCEINT, International Center for the Environmental Implications of NanoTechnologies, 13545 Aix-en-Provence, France.

<sup>c</sup> Aix Marseille Univ, CEA, CNRS, Laboratory for Microbial Ecology of the Rhizosphere and Extreme Environments (LEMIRE), UMR7265 BIAM, F-13108 Saint-Paul-lez-Durance, France.

<sup>d</sup> Aix Marseille Univ, CNRS, FR 3098 ECCOREV, F-13545 Aix-en-Provence, France.

<sup>e</sup> Duke university, Civil and Environmental Engineering, Durham, USA.

<sup>f</sup> CIRAD, UPR Recyclage et risque, F-34398 Montpellier, France  
Recyclage et Risque, Univ Montpellier, CIRAD, Montpellier, France

\* Corresponding author: Emmanuel Doelsch [doelsch@cirad.fr](mailto:doelsch@cirad.fr)

Figure S1. Silver K-edge XANES spectra of the PVP-AgNPs and SiO<sub>2</sub>-AgNPs compared to a metallic silver reference compound.

Figure S2. Evolution of the zeta potential of the PVP-AgNPs and SiO<sub>2</sub>-AgNPs in Milli-Q water as a function of pH.

Figure S3. Principal components analysis of the dataset.

Table S1. Soil Characteristics.

Table S2.

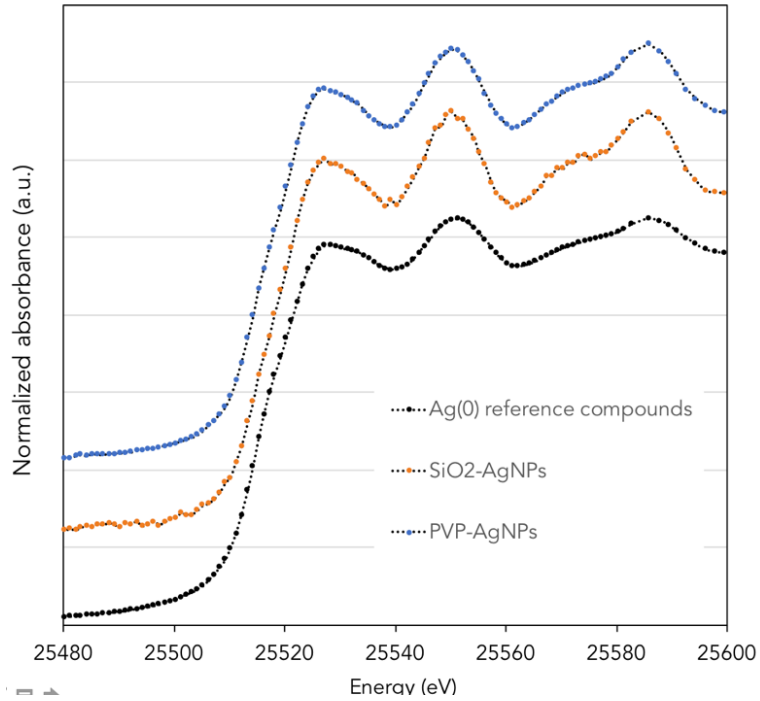

Figure S1. Silver K-edge XANES spectra of the PVP-AgNPs and SiO<sub>2</sub>-AgNPs compared to a metallic silver reference compound.

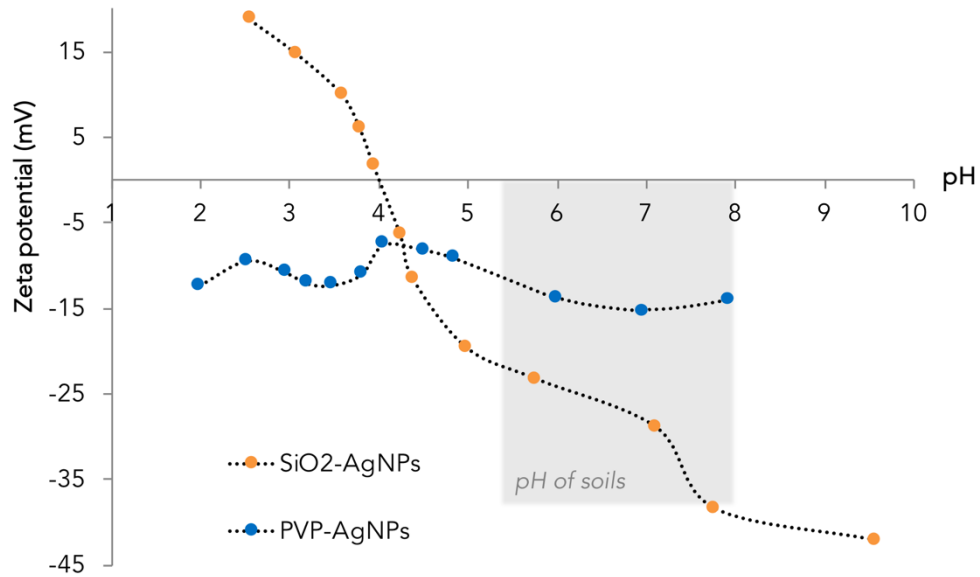

Figure S2. Evolution of the zeta potential of the PVP-AgNPs and SiO<sub>2</sub>-AgNPs in Milli-Q water as a function of pH.

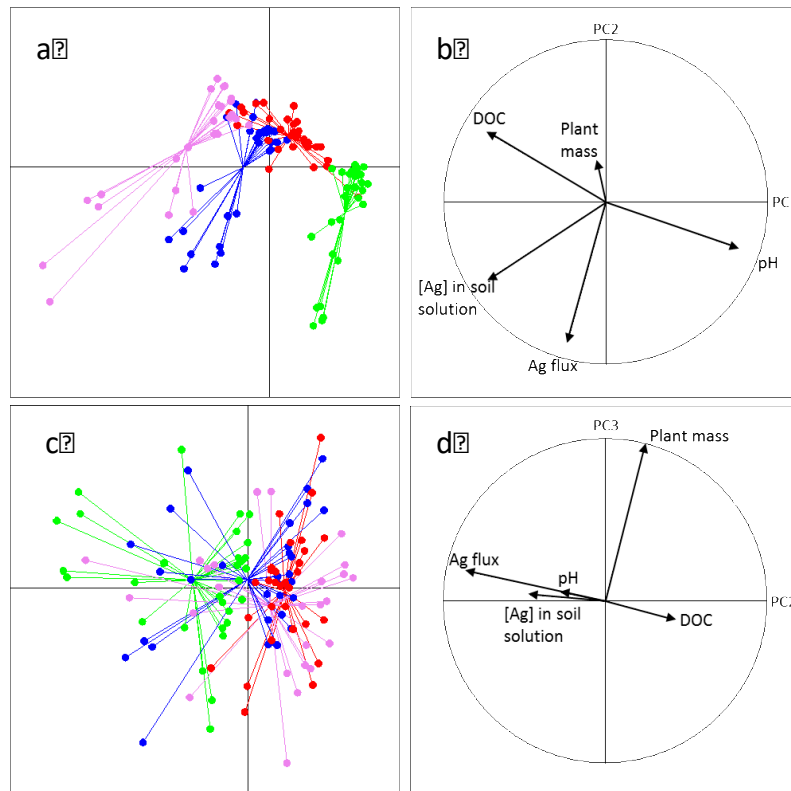

Figure S3. Principal components analysis of the dataset. On the three first principal components, PC1 explained 34.6% of the variability, PC2 25.2% and PC3 19.7%. Score plots according to the type of soil on PC1 and PC2 (1a) or PC2 and PC3 (1b). Correlation loading plots of the variables on PC1 and PC2 (1b) and PC2 and PC3 (1d). The observations corresponding to the different soils are represented by red dots for the clay loam soil, pink dots for the loam-high MO soil, blue dots for the sandy soil, and green dots for the loam-high carbonate soil.

Table S1. Soil characteristics.

| Soil name (texture)   | Taxonomy (WRB) | Location                 | pH  | Organic C (%) | Carbonate (%) | CEC (cmol.kg) | Clay (%) | Silt (%) | Sand (%) |
|-----------------------|----------------|--------------------------|-----|---------------|---------------|---------------|----------|----------|----------|
| Clay                  | Vertisol       | Hanhofen, Germany        | 7.1 | 1.64          | 1.4           | 27.2          | 40.7     | 34.5     | 24.5     |
| Loam – high OM        | Luvisol        | Côte Saint-André, France | 6.3 | 3.93          | <0.1          | 15.3          | 19.0     | 41.0     | 40.0     |
| Loam – high carbonate | Rendosol       | Collias, France          | 8.1 | 0.15          | 28.9          | 5.1           | 13.9     | 46.4     | 39.7     |
| Sandy loam            | Gleysol        | Siebeldingen, Germany    | 5.5 | 1.77          | <0.1          | 10.1          | 8.2      | 15.3     | 76.5     |
